# Supplementary material for: Intrinsic peroxidase-like activity and enhanced photo-Fenton reactivity of iron-substituted polyoxometallate nanostructures
Source: Royal Society of Chemistry journal article supplement (doi:10.1039/c8dt01146j), 2018-01-01
Supplement: c8dt01146j1.pdf [file c8dt01146j1.pdf]

Supplementary Information

**Intrinsic Peroxidase-like Activity and Enhanced Photo-Fenton Reactivity of Iron-substituted Polyoxometallate nanostructures**

Akif Zeb, Shafaq Sahar, Umair Yaqub Qazi, Atheer Hameid Odda, Naseeb Ullah, Ya-Nan Liu,  
Ishtiaq A. Qazi, An-Wu Xu\*

\*anwuxu@ustc.edu.cn

**Content**

**Figure S1** SEM image of as-prepared  $K_3PW_{12}O_{40}$  (KPW).

**Figure S2** TEM image of as-prepared  $KFePW_{12}O_{40}$  showing core-shell structure (a) and nanoparticles on the surface (b).

**Figure S3** SEM image of  $KFePW_{12}O_{40}$  (KFePW) after RhB adsorption.

**Figure S4** TGA analysis of  $KFePW_{12}O_{40}$  (KFePW).

**Figure S5**  $N_2$  adsorption and desorption isotherm of  $K_3PW_{12}O_{40}$  (KPW).

**Figure S6** Temporal UV-visible absorption spectral changes observed for the RhB solutions as a function of irradiation time in KFePW solutions

**Figure S7** Photographs showing RhB solutions after 1 hour of reaction

**Figure S8** KFePW recycle in repetitive degradation of RhB

**Figure S9** Demonstration that the peroxidase-like activity of KFePW does not result from iron ion leaching.

**Figure S10** Schematic presentation of TMB oxidation. Photographs show the color change of solution before (left) and after (right) 5 min reaction.

**Table S2** Comparison of the kinetic constant ( $\text{min}^{-1}$ ) of KFePW and KPW in different reaction systems

**Table S2** Comparison of the catalytic activities of KFePW and other similar materials for degradation of RhB in different conditions

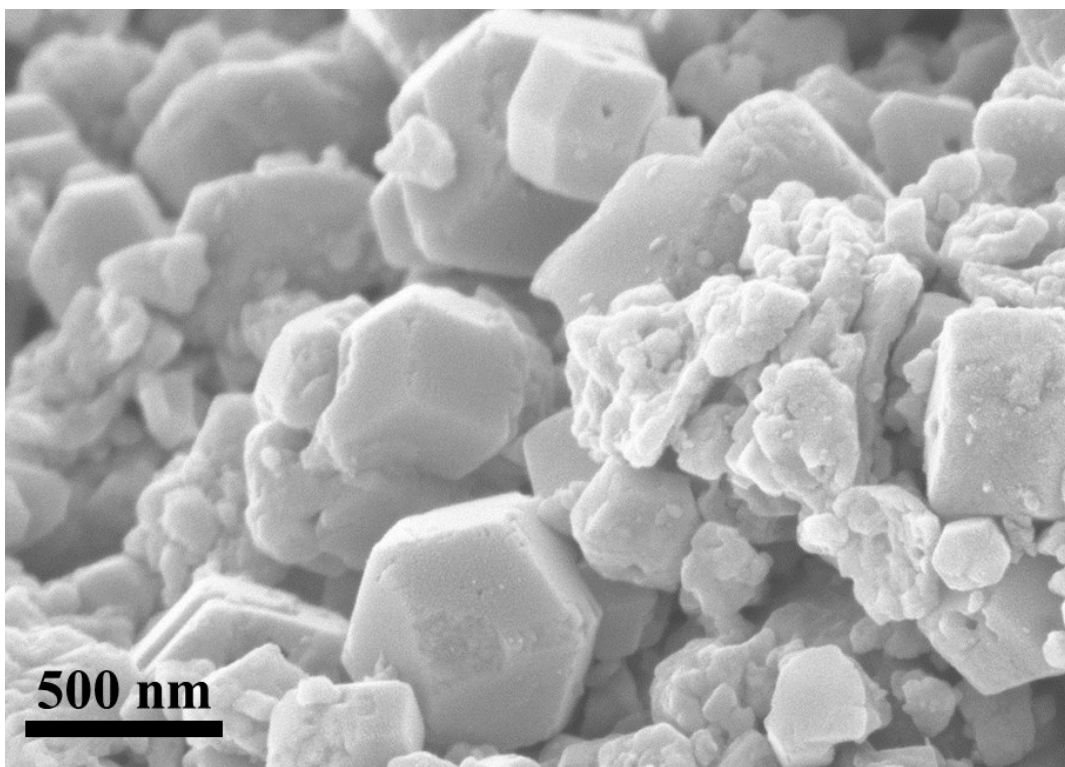

**Figure S1.** SEM image of as-prepared  $\text{K}_3\text{PW}_{12}\text{O}_{40}$  (KPW).

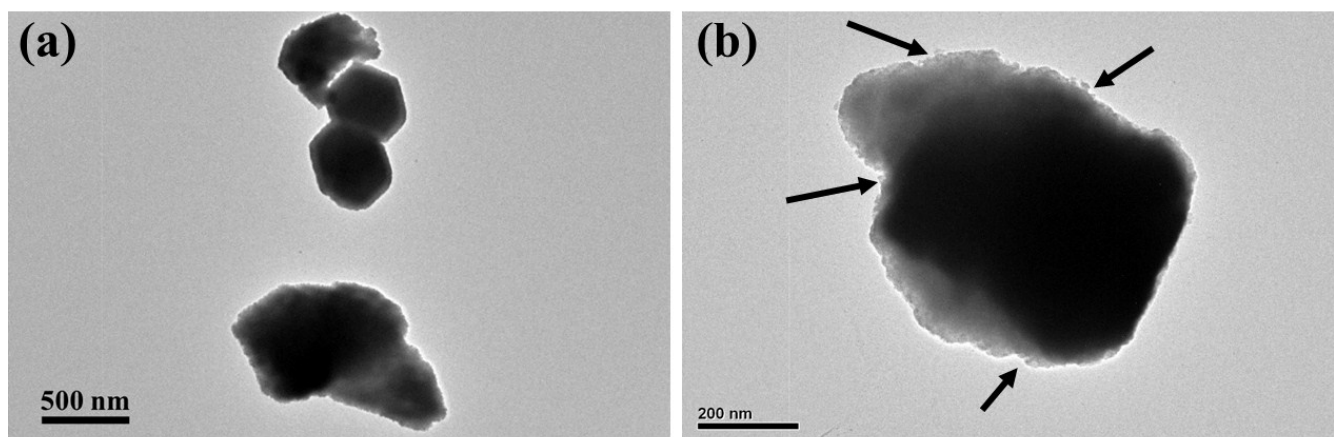

**Figure S2.** TEM image of as-prepared  $\text{KFePW}_{12}\text{O}_{40}$  showing core-shell structure (a) and nanoparticles on the surface (b).

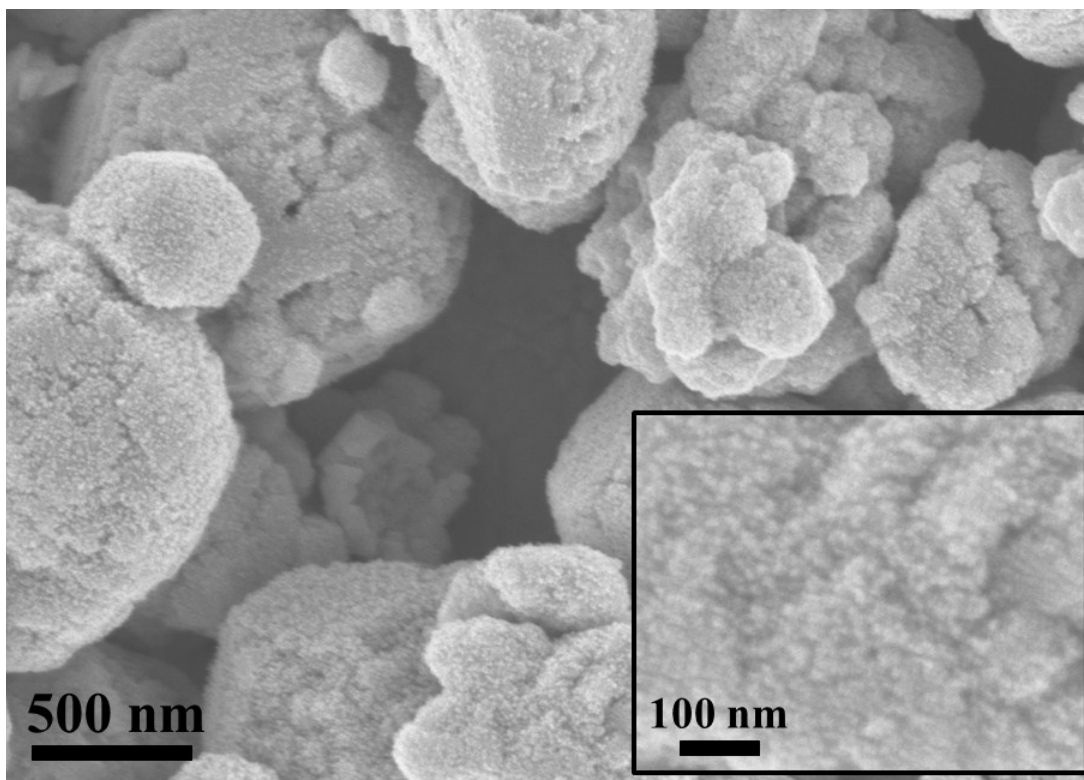

Figure S3. SEM image of  $\text{KFePW}_{12}\text{O}_{40}$  (KFePW) after RhB adsorption.

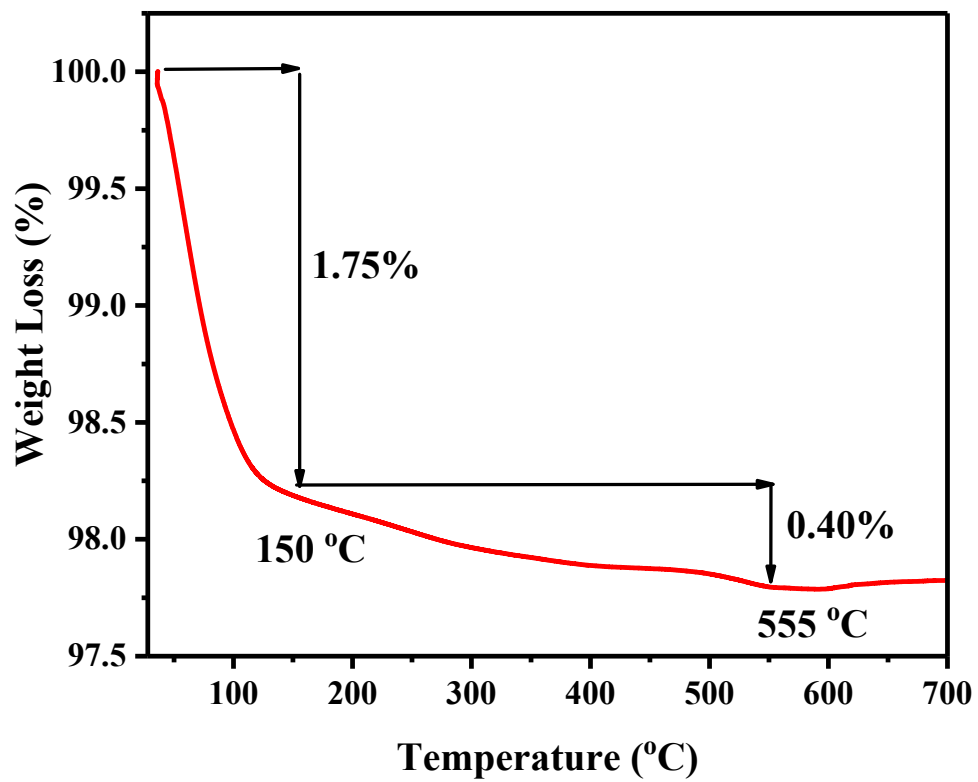

Figure S4. TGA analysis of  $\text{KFePW}_{12}\text{O}_{40}$  (KFePW).

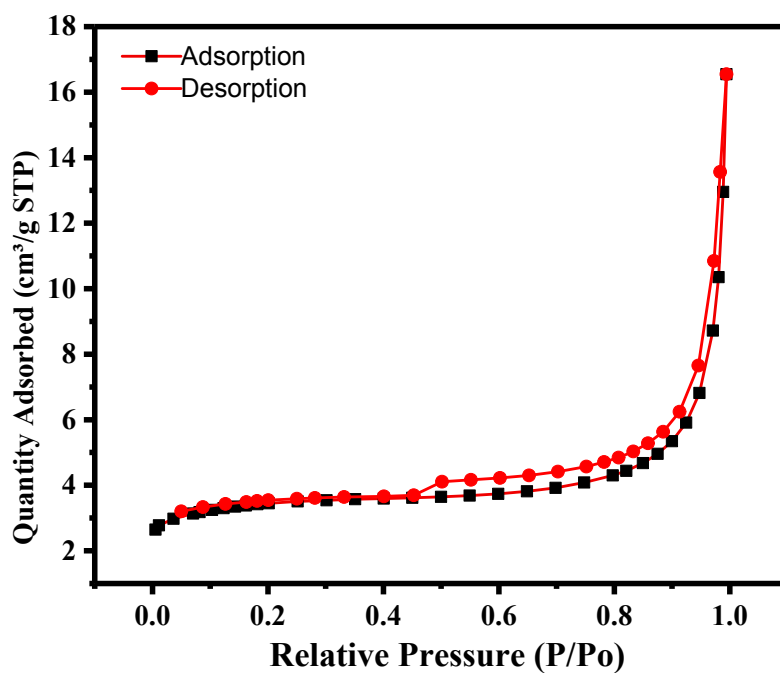

**Figure S5.** N<sub>2</sub> adsorption and desorption isotherm of K<sub>3</sub>PW<sub>12</sub>O<sub>40</sub> (KPW).

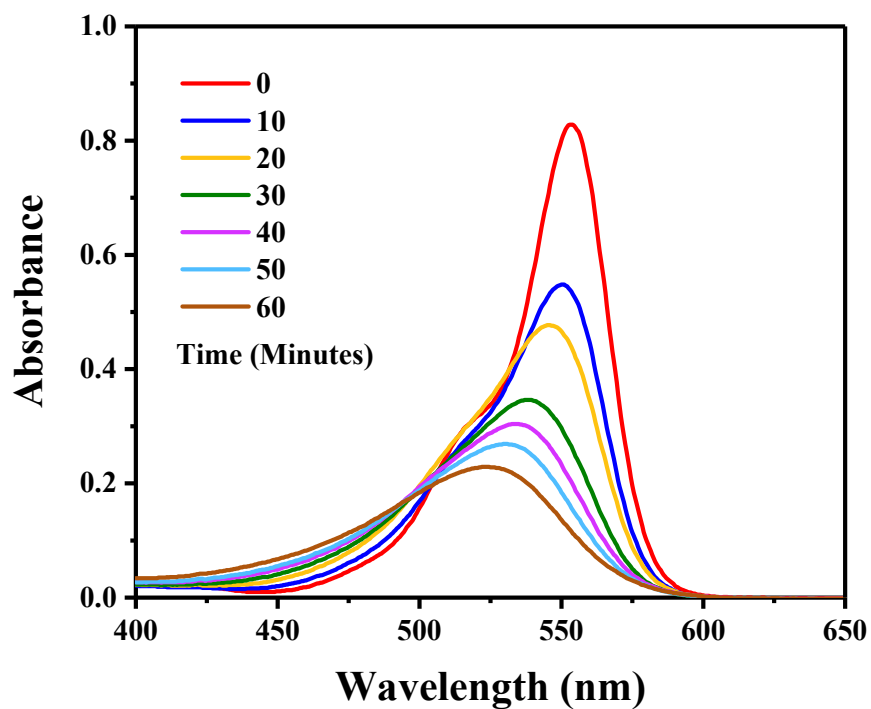

**Figure S6.** Temporal UV-visible absorption spectral changes observed for the RhB solutions as a function of irradiation time in KFePW solutions [catalyst] = 0.2 g L<sup>-1</sup>, [H<sub>2</sub>O<sub>2</sub>] = 20 mM; [RhB] = 5 mM at a pH of 7.

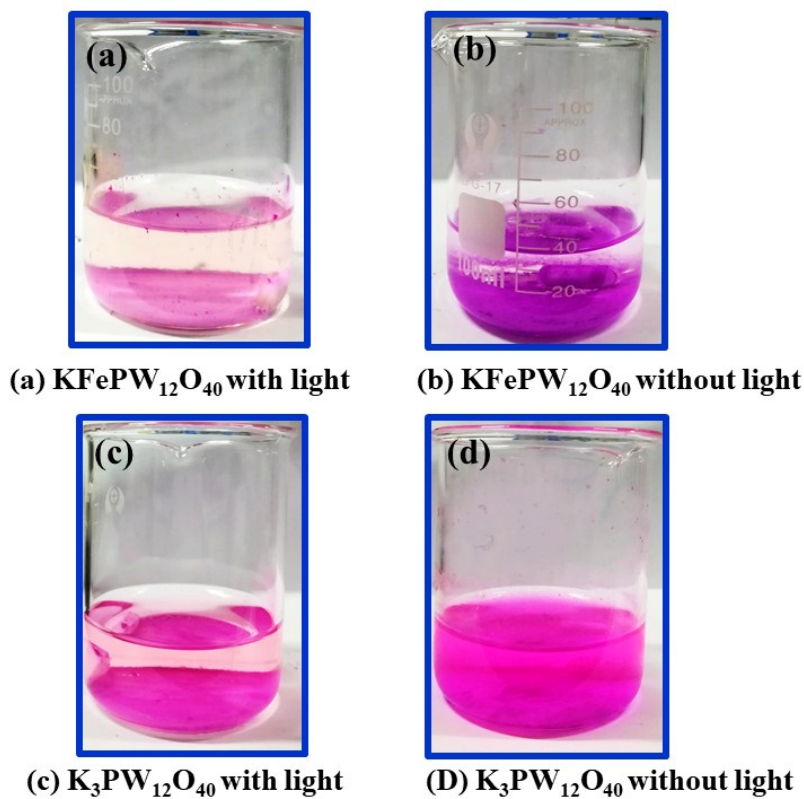

**Figure S7.** Photographs showing RhB solutions after 1 hour of reaction; [catalyst] =  $0.2 \text{ g L}^{-1}$ ,  $[\text{H}_2\text{O}_2]$  =  $20 \text{ mM}$ ; [RhB] =  $5 \text{ mM}$  at a pH of 7.

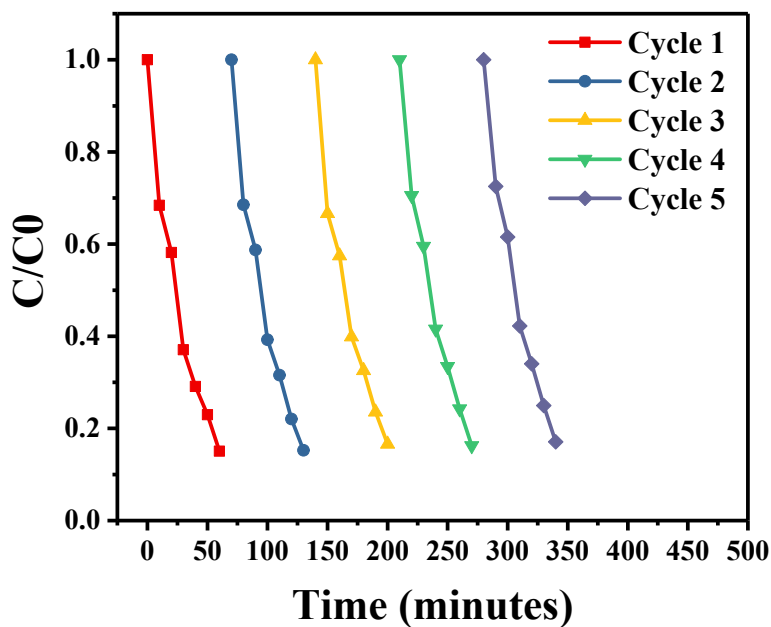

**Figure S8.** KFePW recycle in repetitive degradation of RhB; [catalyst] =  $0.2 \text{ g L}^{-1}$ ,  $[\text{H}_2\text{O}_2]$  =  $20 \text{ mM}$ ; [RhB] =  $5 \text{ mM}$  at a pH of 7.

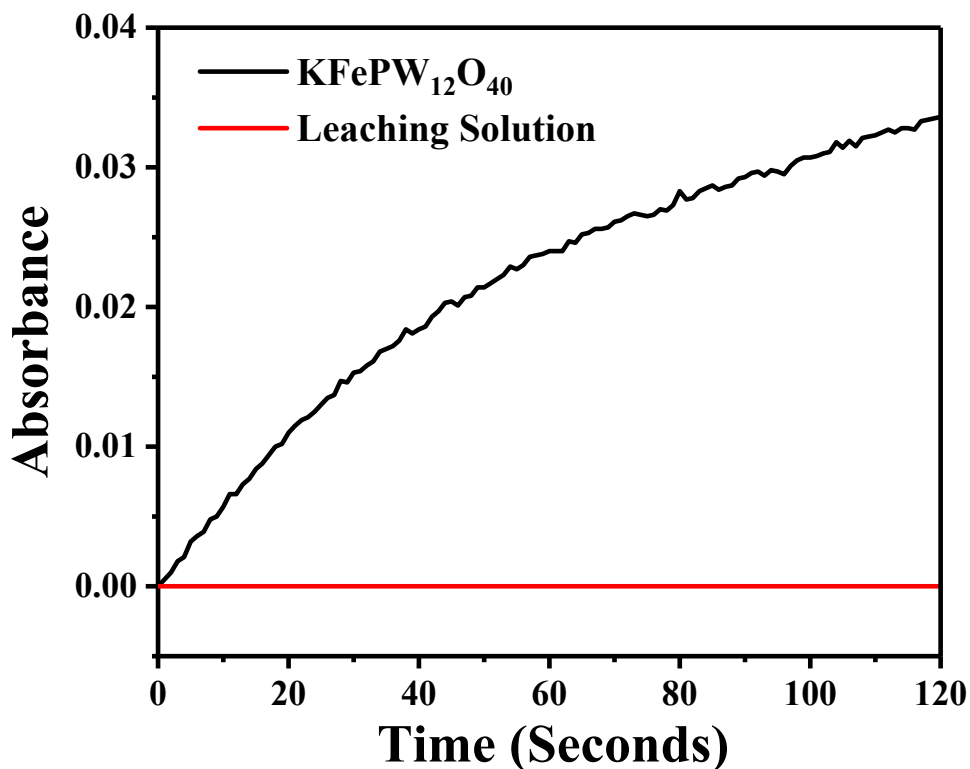

**Figure S9.** Demonstration that the peroxidase-like activity of KFePW does not result from iron ion leaching.

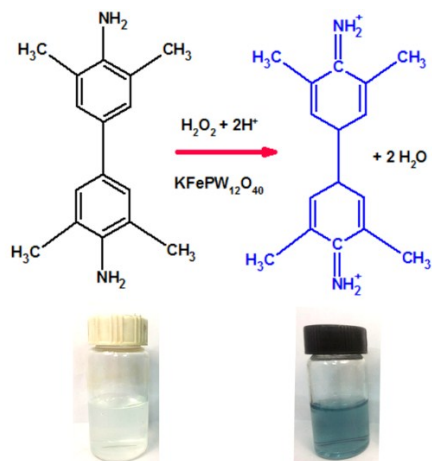

**Figure S10.** Schematic presentation of TMB oxidation. Photographs show the color change of solution before (left) and after (right) 5 min reaction.

**Table S1** Comparison of the kinetic constant ( $\text{min}^{-1}$ ) of KFePW and KPW in different reaction systems

|          | KWP    | KWP+H <sub>2</sub> O <sub>2</sub> | KFePW  | KFePW+H <sub>2</sub> O <sub>2</sub> |
|----------|--------|-----------------------------------|--------|-------------------------------------|
| In Dark  | 0.0039 | 0.0036                            | 0.0073 | 0.0116                              |
| In Light | 0.0041 | 0.0042                            | 0.007  | 0.0305                              |

**Table S2** Comparison of the catalytic activities of KFePW and other similar materials for degradation of RhB in different conditions

| Catalyst                                                                            | H <sub>2</sub> O <sub>2</sub> conc. mM | RhB conc. (ppm) | Catalyst amount (g/L) | pH      | Degradation rate (min <sup>-1</sup> ) | Reference         |
|-------------------------------------------------------------------------------------|----------------------------------------|-----------------|-----------------------|---------|---------------------------------------|-------------------|
| KFePW <sub>12</sub> O <sub>40</sub>                                                 | 38                                     | 10              | 0.05                  | Neutral | 0.0305                                | <i>This study</i> |
| K <sub>3</sub> PW <sub>12</sub> O <sub>40</sub>                                     | 38                                     | 10              | 0.05                  | Neutral | 0.0042                                | <i>This study</i> |
| nanosphere α-Fe <sub>2</sub> O <sub>3</sub>                                         | -                                      | 100             | -                     | Neutral | 0.0133                                | 1                 |
| Fe <sub>3</sub> O <sub>4</sub>                                                      | 90                                     | 10              | 0.05                  | Neutral | 0.0105                                | 2                 |
| Pt loaded C-ZnFe <sub>2</sub> O <sub>4</sub>                                        | 5x10 <sup>3</sup>                      | 5               | 0.04                  | Neutral | 9.31                                  | 3                 |
| VO <sub>x</sub>                                                                     | 20                                     | 10              | 0.2                   | Neutral | 5.79                                  | 4                 |
| Fe <sub>3</sub> O <sub>4</sub> /g-C <sub>3</sub> N <sub>4</sub> NC                  | 90                                     | 10              | 0.05                  | Neutral | 0.02                                  | 2                 |
| H <sub>3</sub> PW <sub>12</sub> O <sub>40</sub> /SiO <sub>2</sub>                   | -                                      | 10              | 0.05                  | 2.5     | 0.03                                  | 5                 |
| HPW@ MIL-53(Fe)                                                                     | -                                      | 20              | 0.02                  | Neutral | 0.0141                                | 6                 |
| [Co <sub>2</sub> (4,4'-bpy)](4,4'-obb) <sub>2</sub>                                 | -                                      | 100             | 2                     | Neutral | 0.013                                 | 7                 |
| [Ni <sub>2</sub> (4,4'-bpy) <sub>2</sub> ](4,4'-obb) <sub>2</sub> ·H <sub>2</sub> O | -                                      | 100             | 2                     | Neutral | 0.008                                 | 7                 |
| [Zn <sub>2</sub> (4,4'-bpy)](4,4'-obb) <sub>2</sub>                                 | -                                      | 100             | 2                     | Neutral | 0.007                                 | 7                 |

## References

1. RSC Adv., 2016, **6**, 75347–75358.
2. Chin. J. Catal., 2017, **38**, 2110–2119.
3. J. Mater. Chem. A, 2015, **3**, 18578–18585
4. ACS Appl. Mater. Interfaces, 2016, **8**, 30126–30132
5. Int. J. Photoenergy, 2013, **1**, 1–12.
6. Environ. Prog. Sustainable Energy, 2017, **36**, 1342–1350.
7. J. Phys. Chem. B, 2006, **110**, 13759–13768
